# Supplementary material for: A mono-oxo-bridged binuclear iron(iii) complex with a Fe–O–Fe angle of 180.0° and its catalytic activity for hydrogen evolution
Source: Royal Society of Chemistry journal article supplement (doi:10.1039/d1nj05904a), 2022-01-01
Supplement: d1nj05904a1.pdf [file d1nj05904a1.pdf]

## Supplementary Materials

### A mono-oxo-bridged binuclear iron(III) complex with a Fe-O-Fe angle of 180.0° and its catalytic activity for hydrogen evolution

Xia-Xing Sun, Juan Du, Jie-Jie Tan and Shu-Zhong Zhan\*

*College of Chemistry and Chemical Engineering, South China University of Technology, Guangzhou 510640, China*

#### Table of Contents

|    |                                                                                                                                                                                                                         |
|----|-------------------------------------------------------------------------------------------------------------------------------------------------------------------------------------------------------------------------|
| 1. | <b>Physical measurements</b>                                                                                                                                                                                            |
| 2  | <b>Fig. S1.</b> IR spectra of the ligand, H <sub>2</sub> bpc, and the iron complex, [(H <sub>2</sub> O)(bpc)Fe-O-Fe(bpc)(H <sub>2</sub> O)].                                                                            |
| 3  | <b>Fig. S2.</b> IR spectra of the iron complex in solid and in DMF (0.05 M).                                                                                                                                            |
| 4  | <b>Fig. S3.</b> <sup>1</sup> H NMR spectrum of the ligand, H <sub>2</sub> bpc in DMSO. 1) 7.690 ppm; 2) 10.860 ppm; 3) 8.813 ppm; 4) 8.167 ppm; 5) 8.086 ppm; 6) 8.673 ppm.                                             |
| 5  | <b>Fig. S4.</b> <sup>1</sup> H NMR spectrum of the iron complex in DMSO.                                                                                                                                                |
| 6  | <b>Fig. S5.</b> Raman spectra of the iron complex.                                                                                                                                                                      |
| 7  | <b>Fig. S6.</b> Magnetic behavior of [(H <sub>2</sub> O)(bpc)Fe-O-Fe(bpc)(H <sub>2</sub> O)] under varying temperature. The solid line represents the result of the fitting of the parameters of Eq. (1) with the data. |
| 8  | <b>Fig. S7.</b> UV-Vis spectra of the iron complex (0.235 mM), H <sub>2</sub> bpc (0.235 mM) and FeCl <sub>3</sub> (0.235 mM) in DMF.                                                                                   |

|    |                                                                                                                                                                                                                                                                                                                                                      |
|----|------------------------------------------------------------------------------------------------------------------------------------------------------------------------------------------------------------------------------------------------------------------------------------------------------------------------------------------------------|
| 9  | <b>Fig. S8.</b> Cyclic voltammograms of 0.516 mM [(H <sub>2</sub> O)(bpc)Fe-O-Fe(bpc)(H <sub>2</sub> O)], or FeCl <sub>3</sub> in 0.10 M of [ <i>n</i> -Bu <sub>4</sub> N]ClO <sub>4</sub> CH <sub>3</sub> CN solution at a glassy carbon electrode and a scan rate of 100 mV/s, Ag/AgNO <sub>3</sub> reference electrode, Fc internal standard (*). |
| 10 | <b>Fig. S9.</b> Scan rate dependence of precatalytic waves for a 5.16 mM solution of [(H <sub>2</sub> O)(bpc)Fe-O-Fe(bpc)(H <sub>2</sub> O)] (0.10 M [ <i>n</i> -Bu <sub>4</sub> N]ClO <sub>4</sub> ), at scan rates from 50 to 300 mV/s.                                                                                                            |
| 11 | <b>Fig. S10.</b> Cyclic voltammograms of [(H <sub>2</sub> O)(bpc)Fe-O-Fe(bpc)(H <sub>2</sub> O)] (1.2 mM) with varying scan rate in 0.10 M of [ <i>n</i> -Bu <sub>4</sub> N]ClO <sub>4</sub> DMF solution at a glassy carbon electrode and Ag/AgNO <sub>3</sub> reference electrode, Fc internal standard (*).                                       |
| 12 | <b>Fig. S11.</b> Cyclic voltammograms of [(H <sub>2</sub> O)(bpc)Fe-O-Fe(bpc)(H <sub>2</sub> O)] (1.2 mM) with 0.67 mM acetic acid at varying scan rate in 0.10 M of [ <i>n</i> -Bu <sub>4</sub> N]ClO <sub>4</sub> DMF solution at a glassy carbon electrode and Ag/AgNO <sub>3</sub> reference electrode, Fc internal standard (*).                |
| 13 | <b>Fig. S12.</b> Cyclic voltammograms of [(H <sub>2</sub> O)(bpc)Fe-O-Fe(bpc)(H <sub>2</sub> O)] (1.2 mM) with 1.0 mM acetic acid at varying scan rate in 0.10 M of [ <i>n</i> -Bu <sub>4</sub> N]ClO <sub>4</sub> DMF solution at a glassy carbon electrode and Ag/AgNO <sub>3</sub> reference electrode, Fc internal standard (*).                 |
| 14 | <b>Fig. S13.</b> Cyclic voltammograms of [(H <sub>2</sub> O)(bpc)Fe-O-Fe(bpc)(H <sub>2</sub> O)] (1.2 mM) with 1.33 mM acetic acid at varying scan rate in 0.10 M of [ <i>n</i> -Bu <sub>4</sub> N]ClO <sub>4</sub> DMF solution at a glassy carbon electrode and Ag/AgNO <sub>3</sub> reference electrode, Fc internal standard (*).                |
| 15 | <b>Fig. S14.</b> Cyclic voltammograms of [(H <sub>2</sub> O)(bpc)Fe-O-Fe(bpc)(H <sub>2</sub> O)] (1.2 mM) with 1.67 mM acetic acid at varying scan rate in 0.10 M of [ <i>n</i> -Bu <sub>4</sub> N]ClO <sub>4</sub> DMF solution at a glassy carbon electrode and Ag/AgNO <sub>3</sub> reference electrode, Fc internal standard (*).                |

|           |                                                                                                                                                                                                                                                                                                                                                                            |
|-----------|----------------------------------------------------------------------------------------------------------------------------------------------------------------------------------------------------------------------------------------------------------------------------------------------------------------------------------------------------------------------------|
| <b>16</b> | <b>Fig. S15.</b> Cyclic voltammograms of $[(\text{H}_2\text{O})(\text{bpc})\text{Fe}-\text{O}-\text{Fe}(\text{bpc})(\text{H}_2\text{O})]$ (1.2 mM) with 2.50 mM acetic acid at varying scan rate in 0.10 M of $[\text{n-Bu}_4\text{N}]\text{ClO}_4$ DMF solution at a glassy carbon electrode and $\text{Ag}/\text{AgNO}_3$ reference electrode, Fc internal standard (*). |
| <b>17</b> | <b>Fig. S16.</b> Cyclic voltammograms of $[(\text{H}_2\text{O})(\text{bpc})\text{Fe}-\text{O}-\text{Fe}(\text{bpc})(\text{H}_2\text{O})]$ (1.2 mM) with 3.30 mM acetic acid at varying scan rate in 0.10 M of $[\text{n-Bu}_4\text{N}]\text{ClO}_4$ DMF solution at a glassy carbon electrode and $\text{Ag}/\text{AgNO}_3$ reference electrode, Fc internal standard (*). |
| <b>18</b> | <b>Fig. S17.</b> $^1\text{H}$ NMR spectra of a DMSO solution of (a) 0.598 mM $[(\text{H}_2\text{O})(\text{bpc})\text{Fe}-\text{O}-\text{Fe}(\text{bpc})(\text{H}_2\text{O})]$ ; (b) 0.598 mM $[(\text{H}_2\text{O})(\text{bpc})\text{Fe}-\text{O}-\text{Fe}(\text{bpc})(\text{H}_2\text{O})]$ with 0.025 M acetic acid; (c) 0.025 M acetic acid.                           |
| <b>19</b> | <b>Fig. S18.</b> UV-Vis spectra of a DMF solution of 0.598 mM $[(\text{H}_2\text{O})(\text{bpc})\text{Fe}-\text{O}-\text{Fe}(\text{bpc})(\text{H}_2\text{O})]$ with or without acetic acid (14.1 mM).                                                                                                                                                                      |

### Physical measurements

IR spectra were obtained as KBr pellets on a Bruker 1600 FT-IR spectrometer from 4000 to 400  $\text{cm}^{-1}$ . NMR analyses were carried out by using a Bruker AV-500 instrument. UV-vis spectra were measured on a Hitachi U-3010. Measurements and analyses for the chemical compositions and valence states of the photocatalysts were carried out by ESCALAB 250 Xi X-photoelectron spectroscopy (XPS) with monochromatic  $\text{Al K}\alpha$  (1486.6 eV) X-ray sources. A Quantum Design SQUID Magnetometer MPMS XL-7 was used to investigate magnetic behavior of the iron complex. ESR spectra of the iron complex were taken on a Bruker Elexsys II E500 ESR spectrometer. Mössbauer spectrum of  $[(\text{H}_2\text{O})(\text{bpc})\text{Fe}-\text{O}-\text{Fe}(\text{bpc})(\text{H}_2\text{O})]$  was measured on a Wss-10 Mössbauer spectrometer. Electrochemical measurements and

analysis were conducted by using a CHI-660E electrochemical analyzer using a three-electrode cell in which a glassy carbon electrode (1 mm in diameter) is the working electrode, a saturated Ag/AgNO<sub>3</sub> electrode is the reference electrode, and a platinum wire is the auxiliary electrode. For organic media, 0.10 M [(*n*-Bu)<sub>4</sub>N]ClO<sub>4</sub> was selected as a supporting electrolyte.

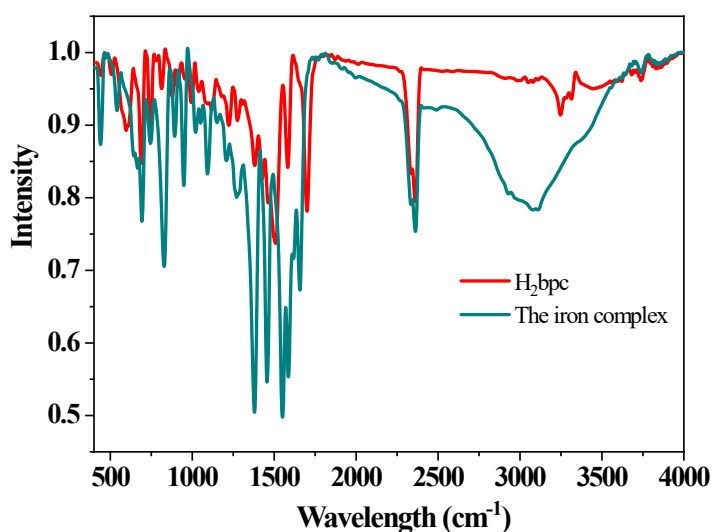

**Fig. S1.** IR spectra of the ligand, H<sub>2</sub>bpc, and the iron complex, [(H<sub>2</sub>O)(bpc)Fe-O-Fe(bpc)(H<sub>2</sub>O)].

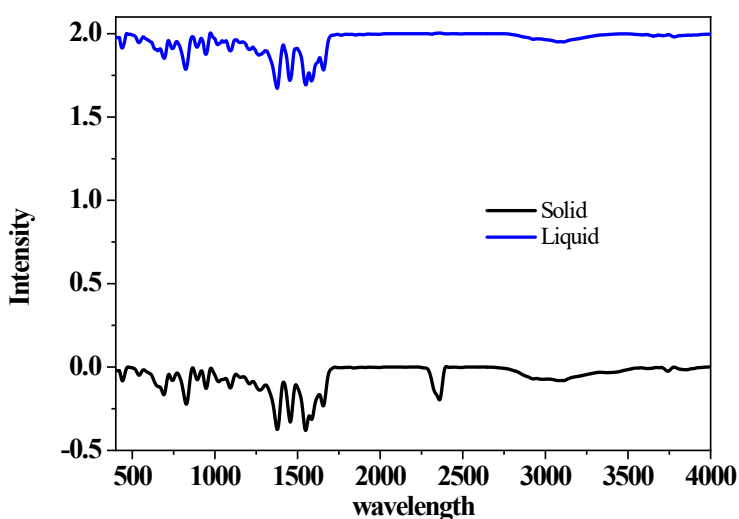

**Fig. S2.** IR spectra of the iron complex in solid and in DMF (0.05 M).

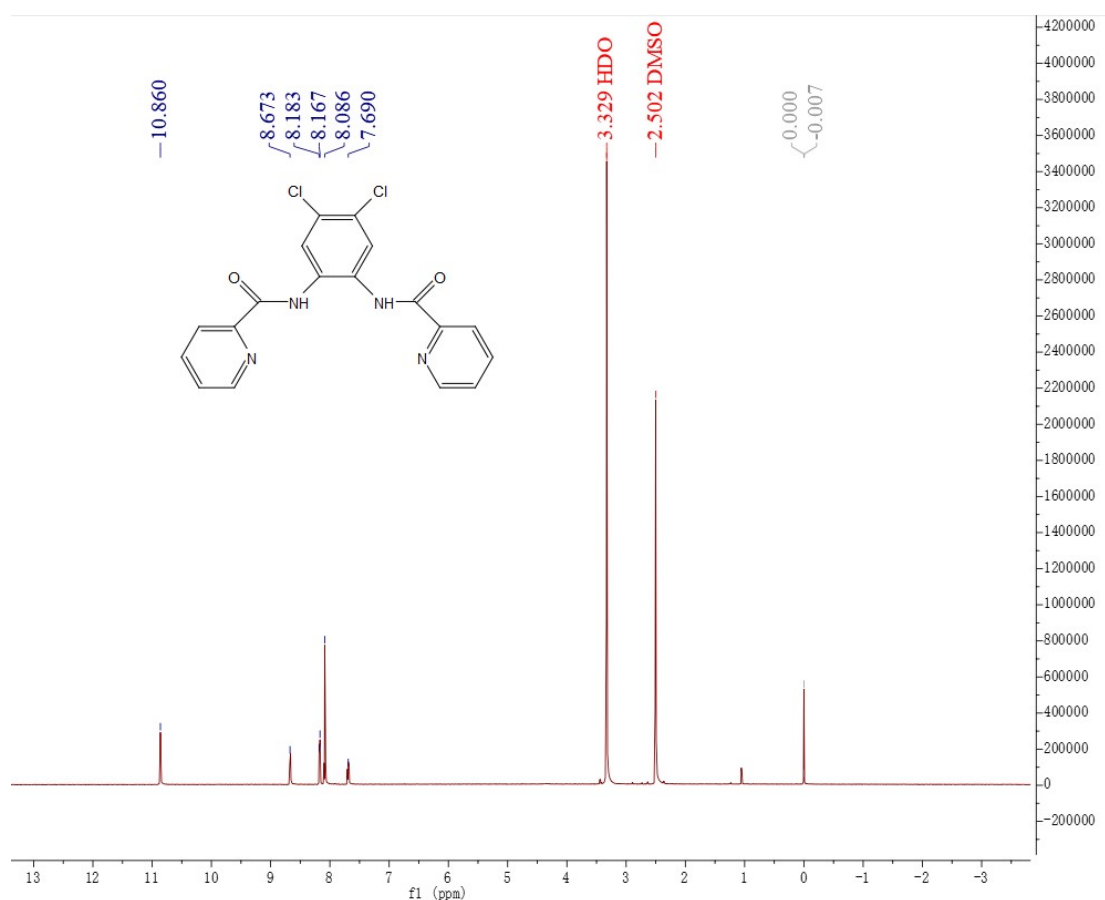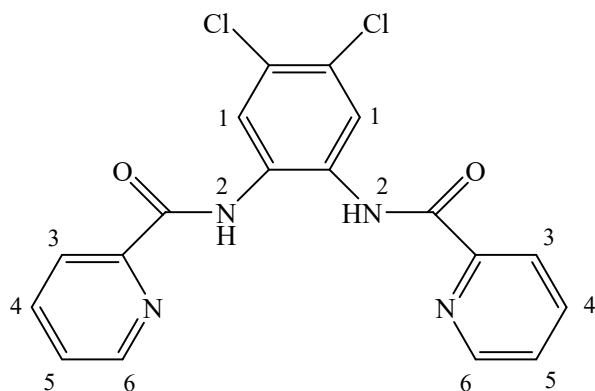

**Fig. S3.**  $^1\text{H}$  NMR spectrum of the ligand,  $\text{H}_2\text{bpc}$  in  $\text{DMSO}$ . 1) 7.690 ppm; 2) 10.860 ppm; 3) 8.813 ppm; 4) 8.167 ppm; 5) 8.086 ppm; 6) 8.673 ppm.

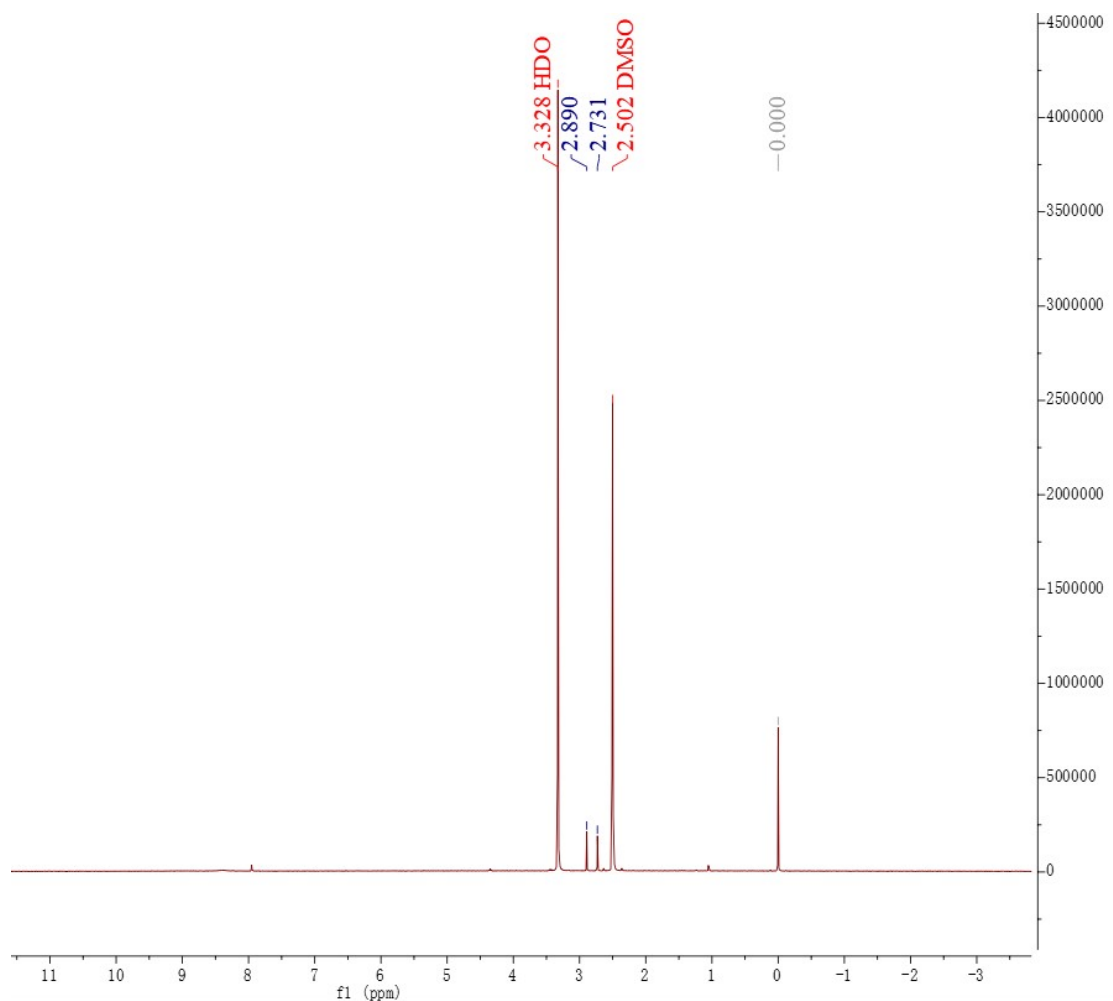

**Fig. S4.** <sup>1</sup>H NMR spectrum of the iron complex in DMSO.

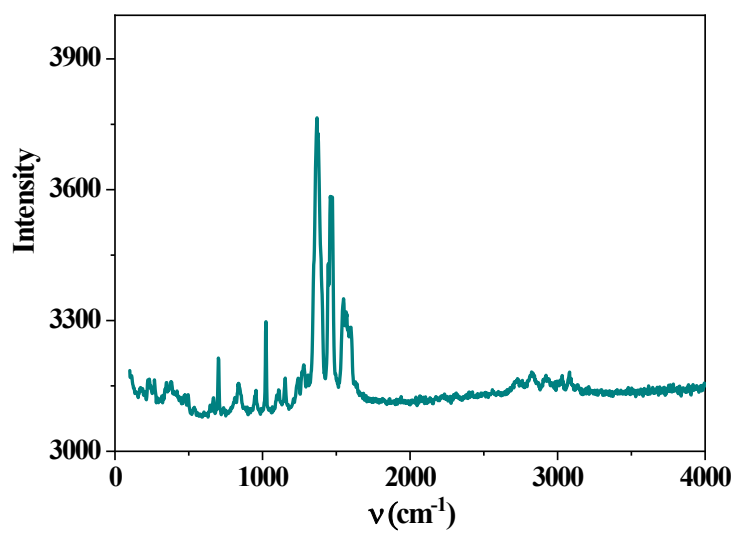

**Fig. S5.** Raman spectra of the iron complex.

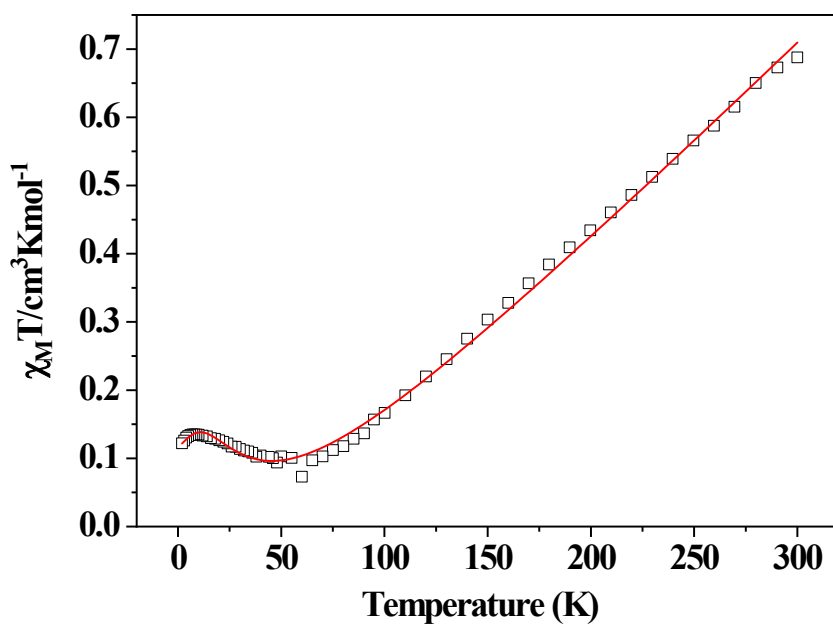

**Fig. S6.** Magnetic behavior of  $[(\text{H}_2\text{O})(\text{bpc})\text{Fe}-\text{O}-\text{Fe}(\text{bpc})(\text{H}_2\text{O})]$  under varying temperature. The solid line represents the result of the fitting of the parameters of Eq. (1) with the data.

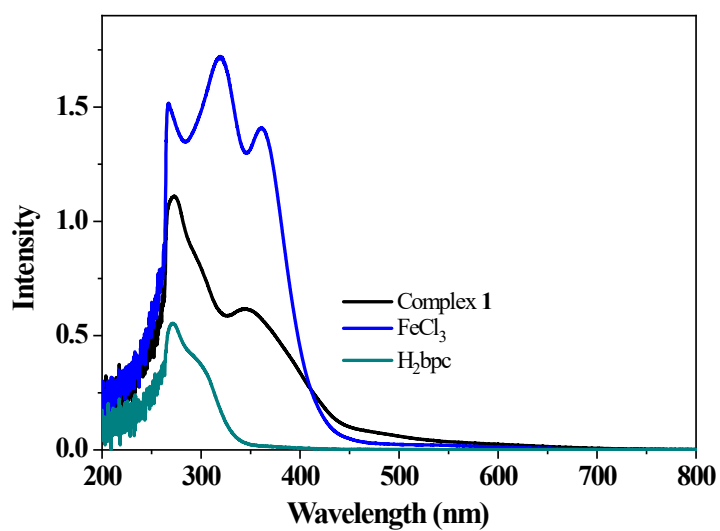

**Fig. S7.** UV-Vis spectra of the iron complex (0.235 mM),  $\text{H}_2\text{bpc}$  (0.235 mM) and  $\text{FeCl}_3$  (0.235 mM) in DMF.

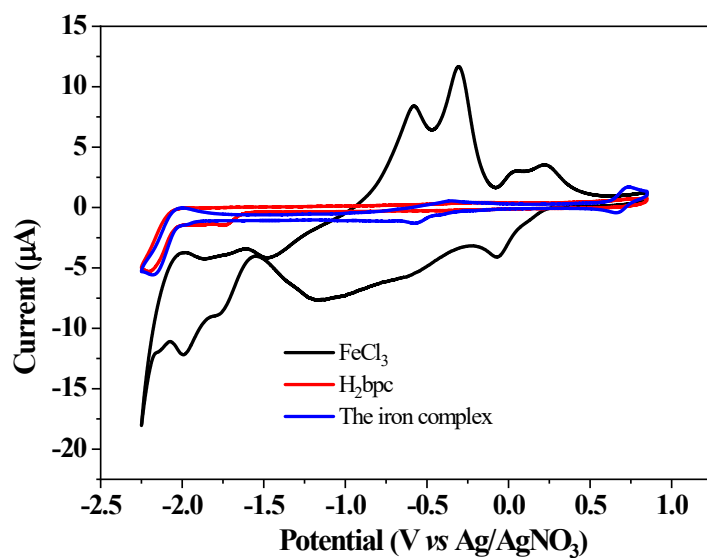

**Fig. S8.** Cyclic voltammograms of 0.516 mM [(H<sub>2</sub>O)(bpc)Fe-O-Fe(bpc)(H<sub>2</sub>O)], or FeCl<sub>3</sub> in 0.10 M of [*n*-Bu<sub>4</sub>N]ClO<sub>4</sub> CH<sub>3</sub>CN solution at a glassy carbon electrode and a scan rate of 100 mV/s, Ag/AgNO<sub>3</sub> reference electrode, Fc internal standard (\*).

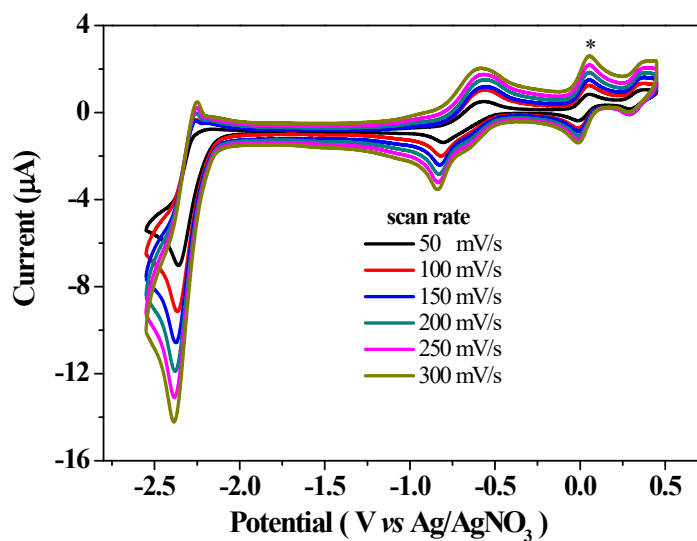



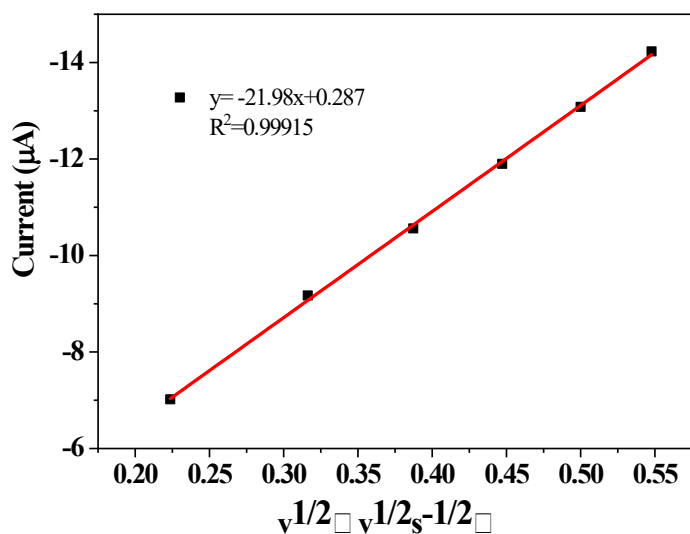

**Fig. S9.** Scan rate dependence of precatalytic waves for a 5.16 mM solution of  $[(\text{H}_2\text{O})(\text{bpc})\text{Fe}-\text{O}-\text{Fe}(\text{bpc})(\text{H}_2\text{O})]$  (0.10 M  $[\text{n-Bu}_4\text{N}]\text{ClO}_4$ ), at scan rates from 50 to 300 mV/s.

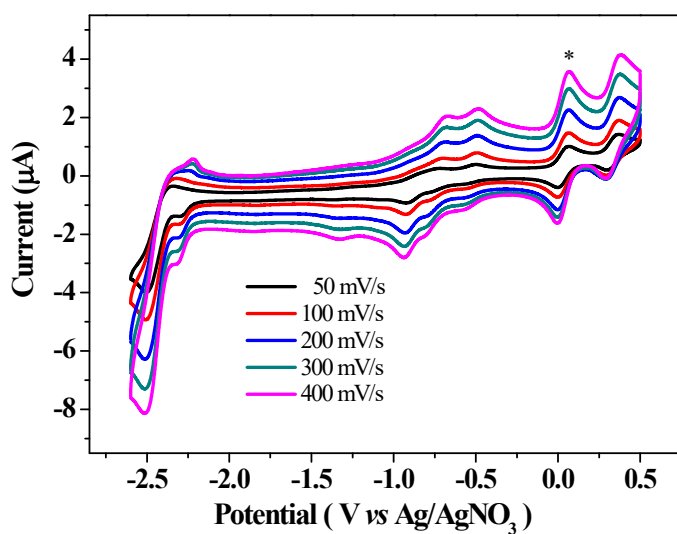

**Fig. S10.** Cyclic voltammograms of  $[(\text{H}_2\text{O})(\text{bpc})\text{Fe}-\text{O}-\text{Fe}(\text{bpc})(\text{H}_2\text{O})]$  (1.2 mM) with varying scan rate in 0.10 M of  $[\text{n-Bu}_4\text{N}]\text{ClO}_4$  DMF solution at a glassy carbon electrode and  $\text{Ag}/\text{AgNO}_3$  reference electrode, Fc internal standard (\*).

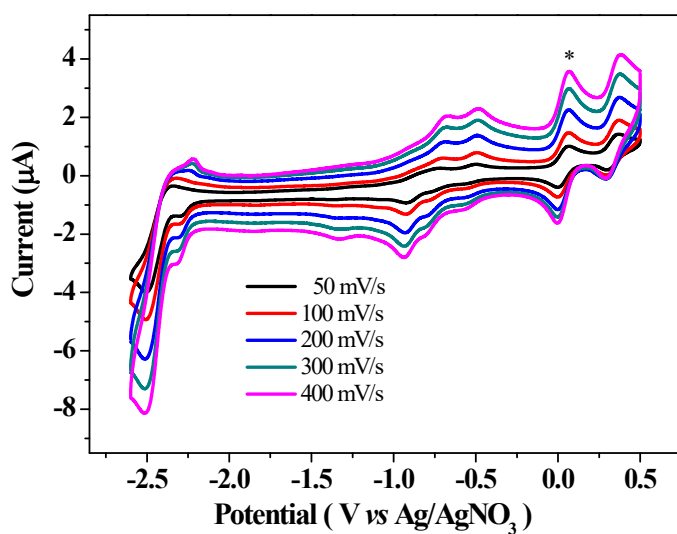

**Fig. S11.** Cyclic voltammograms of  $[(\text{H}_2\text{O})(\text{bpc})\text{Fe}-\text{O}-\text{Fe}(\text{bpc})(\text{H}_2\text{O})]$  (1.2 mM) with 0.67 mM acetic acid at varying scan rate in 0.10 M of  $[\text{n-Bu}_4\text{N}]\text{ClO}_4$  DMF solution at a glassy carbon electrode and  $\text{Ag}/\text{AgNO}_3$  reference electrode, Fc internal standard (\*).

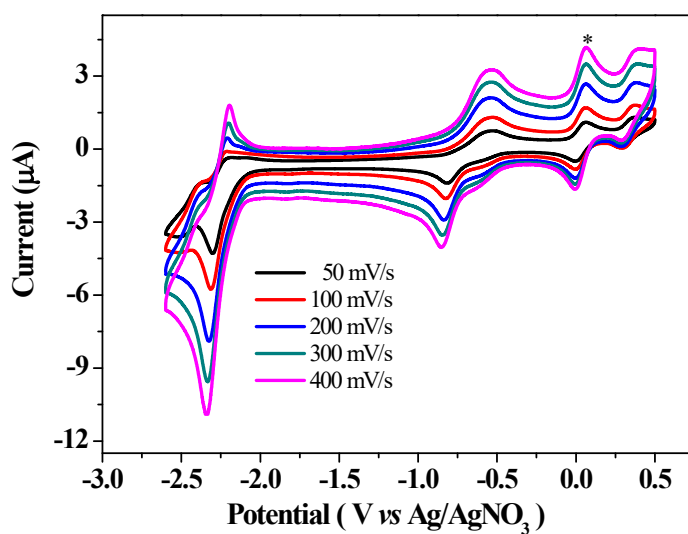

**Fig. S12.** Cyclic voltammograms of  $[(\text{H}_2\text{O})(\text{bpc})\text{Fe}-\text{O}-\text{Fe}(\text{bpc})(\text{H}_2\text{O})]$  (1.2 mM) with 1.0 mM acetic acid at varying scan rate in 0.10 M of  $[\text{n-Bu}_4\text{N}]\text{ClO}_4$  DMF solution at a glassy carbon electrode and  $\text{Ag}/\text{AgNO}_3$  reference electrode, Fc internal standard (\*).

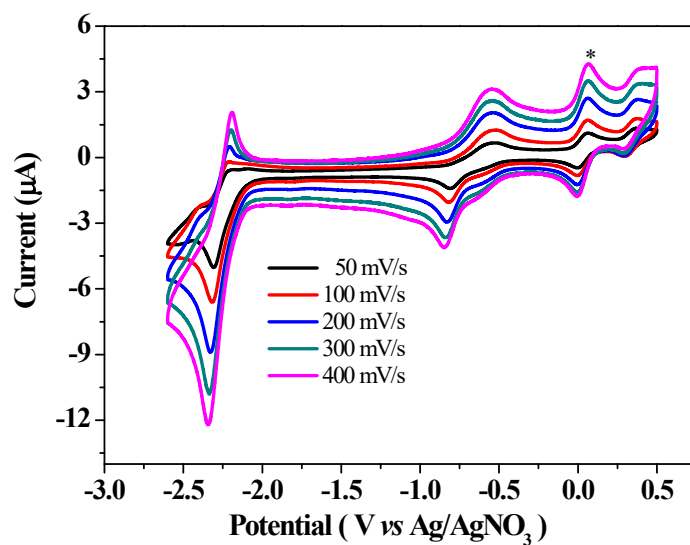

**Fig. S13.** Cyclic voltammograms of  $[(H_2O)(bpc)Fe-O-Fe(bpc)(H_2O)]$  (1.2 mM) with 1.33 mM acetic acid at varying scan rate in 0.10 M of  $[n-Bu_4N]ClO_4$  DMF solution at a glassy carbon electrode and  $Ag/AgNO_3$  reference electrode, Fc internal standard (\*).

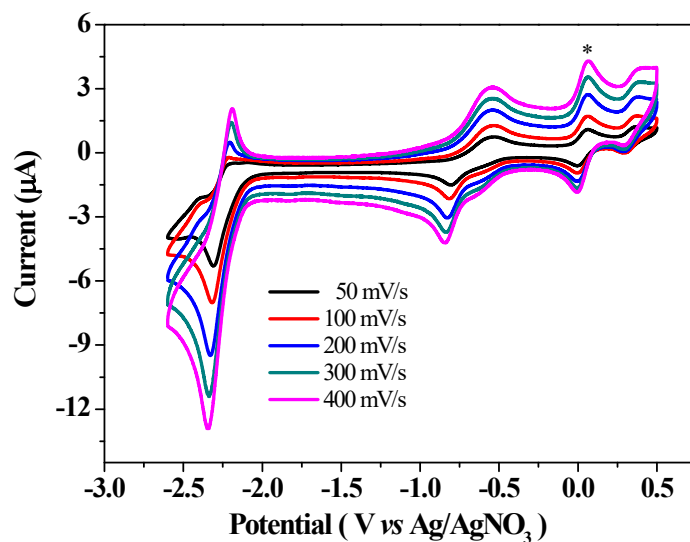

**Fig. S14.** Cyclic voltammograms of  $[(H_2O)(bpc)Fe-O-Fe(bpc)(H_2O)]$  (1.2 mM) with 1.67 mM acetic acid at varying scan rate in 0.10 M of  $[n-Bu_4N]ClO_4$  DMF solution at a glassy carbon electrode and  $Ag/AgNO_3$  reference electrode, Fc internal standard (\*).

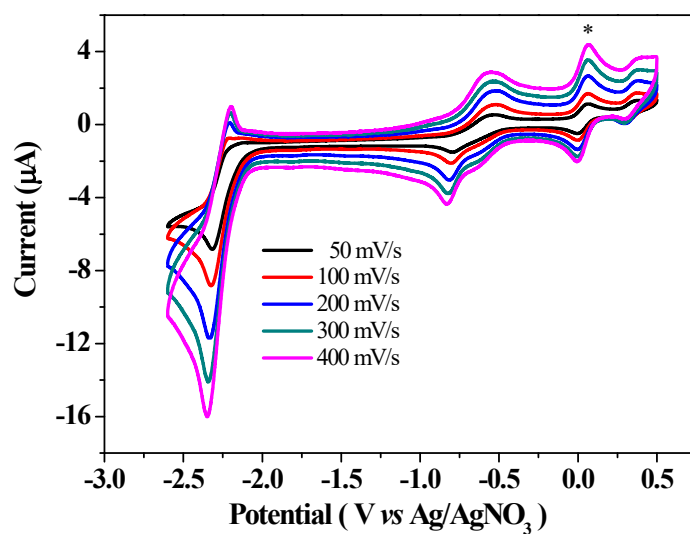

**Fig. S15.** Cyclic voltammograms of  $[(\text{H}_2\text{O})(\text{bpc})\text{Fe}-\text{O}-\text{Fe}(\text{bpc})(\text{H}_2\text{O})]$  (1.2 mM) with 2.50 mM acetic acid at varying scan rate in 0.10 M of  $[\text{n-Bu}_4\text{N}]\text{ClO}_4$  DMF solution at a glassy carbon electrode and  $\text{Ag}/\text{AgNO}_3$  reference electrode, Fc internal standard (\*).

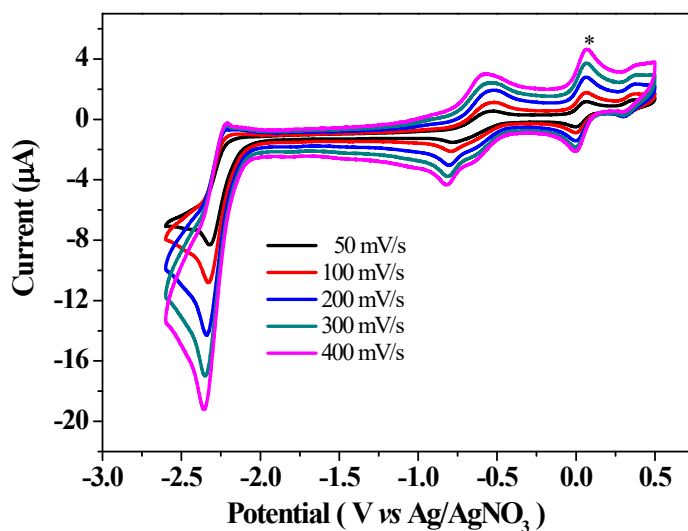

**Fig. S16.** Cyclic voltammograms of  $[(\text{H}_2\text{O})(\text{bpc})\text{Fe}-\text{O}-\text{Fe}(\text{bpc})(\text{H}_2\text{O})]$  (1.2 mM) with 3.30 mM acetic acid at varying scan rate in 0.10 M of  $[\text{n-Bu}_4\text{N}]\text{ClO}_4$  DMF solution at a glassy carbon electrode and  $\text{Ag}/\text{AgNO}_3$  reference electrode, Fc internal standard (\*).

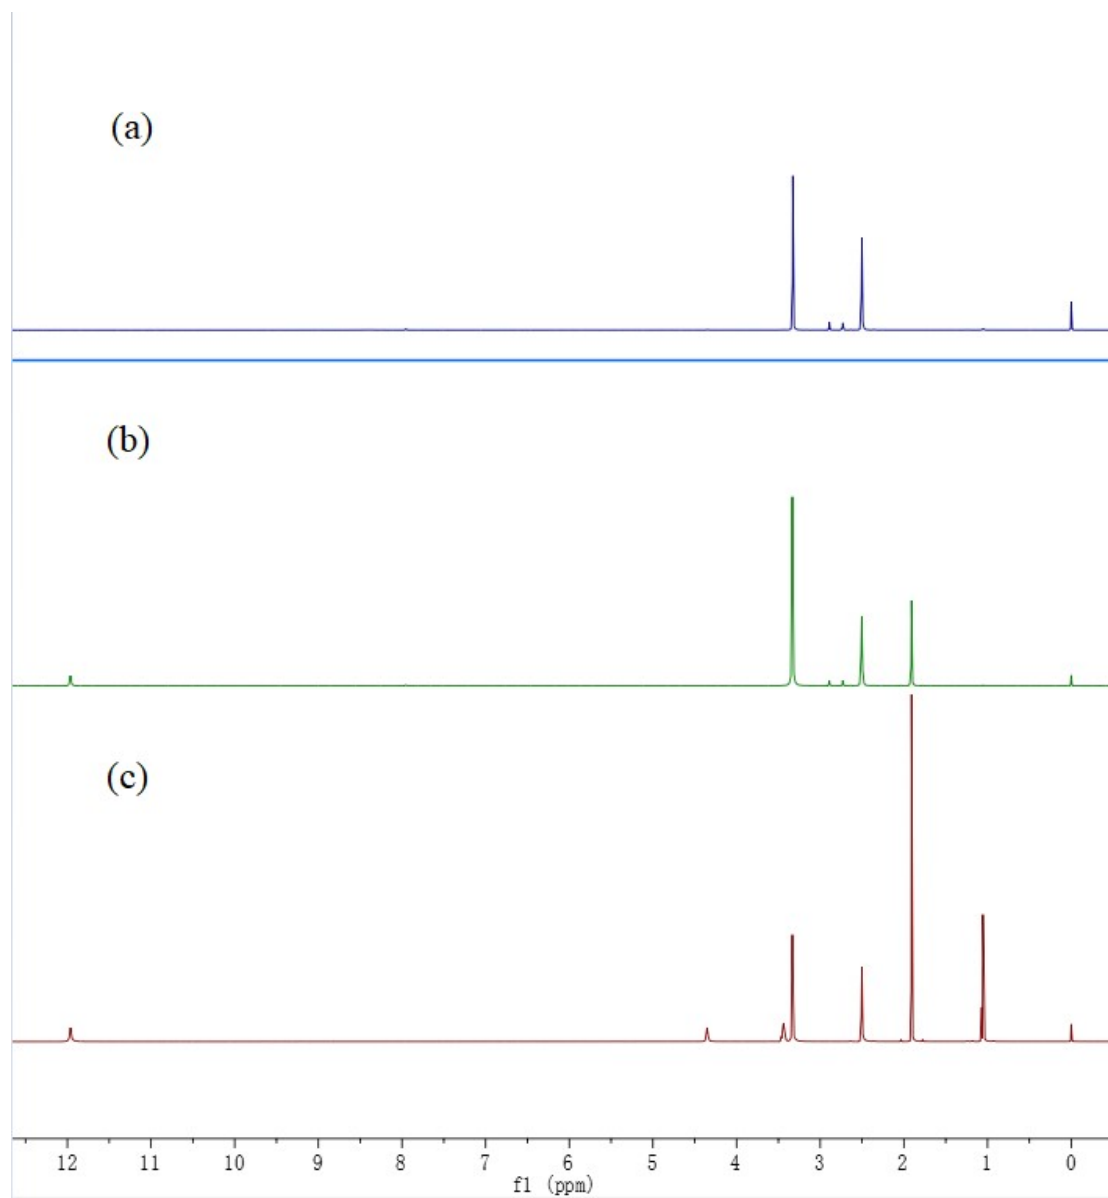

**Fig. S17.**  $^1\text{H}$  NMR spectra of a DMSO solution of (a) 0.598 mM  $[(\text{H}_2\text{O})(\text{bpc})\text{Fe}-\text{O}-\text{Fe}(\text{bpc})(\text{H}_2\text{O})]$ ; (b) 0.598 mM  $[(\text{H}_2\text{O})(\text{bpc})\text{Fe}-\text{O}-\text{Fe}(\text{bpc})(\text{H}_2\text{O})]$  with 0.025 M acetic acid; (c) 0.025 M acetic acid.

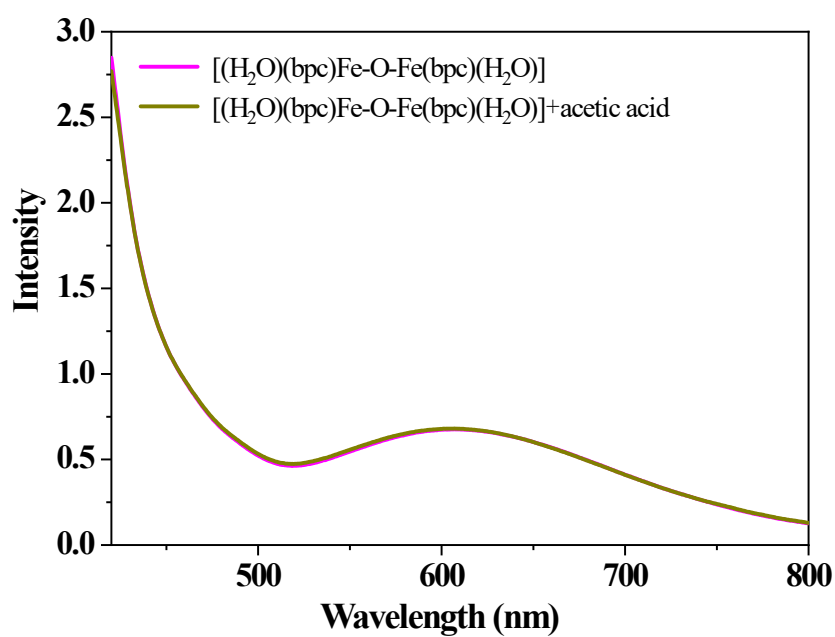

**Fig. S18.** UV-Vis spectra of a DMF solution of 0.598 mM  $[(\text{H}_2\text{O})(\text{bpc})\text{Fe}-\text{O}-\text{Fe}(\text{bpc})(\text{H}_2\text{O})]$  with or without acetic acid (14.1 mM).
